1 **An extracellular Argonaute protein mediates export of repeat-associated**  
2 **small RNAs into vesicles in parasitic nematodes**

3 Chow FWN<sup>1\*</sup>, Koutsovoulos G<sup>2.§\*</sup>, Ovando-Vázquez C<sup>3.§§\*</sup>, Laetsch DR<sup>2</sup>,  
4 Bermúdez-Barrientos JR<sup>3</sup>, Claycomb JM<sup>4</sup>, Blaxter M<sup>2,5\*\*</sup>, Abreu-Goodger C<sup>3\*\*</sup>, Buck  
5 AH<sup>1,5\*\*</sup>

6

7 (1) Institute of Immunology and Infection Research, School of Biological Sciences,  
8 The University of Edinburgh, Edinburgh EH9 3JT, UK

9 (2) Institute of Evolutionary Biology, School of Biological Sciences, The University  
10 of Edinburgh, Edinburgh EH9 3JT, UK

11 3) Unidad de Genómica Avanzada (Langebio), Centro de Investigación y de  
12 Estudios Avanzados del IPN, Irapuato, Guanajuato 36824, México

13 (4) Department of Molecular Genetics, University of Toronto, Toronto, ON M5G  
14 1M1, Canada

15 (5) Centre for Immunity, Infection and Evolution, School of Biological Sciences, The  
16 University of Edinburgh, Edinburgh EH9 3JT, UK

17 § Current address: INRA, UMR 1355 Institute Sophia Agrobiotech, 06903 Sophia  
18 Antipolis, France

19 §§ Current address: CONACYT-CNS-IPICYT, San Luis Potosí, SLP 78216, México

20 \*Author's contributed equally

21 \*\*To whom correspondence should be addressed: a.buck@ed.ac.uk,  
22 cei.abreu@cinvestav.mx, Mark.Blaxter@ed.ac.uk

23

24 **Abstract**

25 Mobile small RNAs are an integral component of the arms race between plants and  
26 fungal parasites, and several studies suggest microRNAs could similarly operate  
27 between parasitic nematodes and their animal hosts. However, whether and how  
28 specific sequences are selected for export by parasites is unknown. Here we use  
29 density gradient purification and proteinase K sensitivity analysis to demonstrate  
30 that a specific Argonaute protein (exWAGO) is secreted in extracellular vesicles  
31 (EVs) released by the gastrointestinal nematode *Heligmosomoides bakeri*, at  
32 multiple copies per EV. Phylogenetic and gene expression analyses demonstrate  
33 exWAGO is highly conserved and abundantly expressed in related parasites,  
34 including the human hookworm and proteomic analyses confirm this is the only  
35 Argonaute secreted by rodent parasites. In contrast, exWAGO orthologues in  
36 species from the free-living genus *Caenorhabditis* are highly diverged. By re-  
37 sequencing and re-annotating the *H. bakeri* genome, and sequencing multiple  
38 small RNA libraries, we determined that the most abundant small RNAs released  
39 from the nematode parasite are not microRNAs but rather secondary small  
40 interfering RNAs (siRNAs) that are produced by RNA-dependent RNA  
41 Polymerases. We further identify distinct evolutionary properties of the siRNAs  
42 resident in free-living or parasitic nematodes versus those exported in EVs by the  
43 parasite and show that the latter are specifically associated with exWAGO.  
44 Together this work identifies an Argonaute protein as a mediator of RNA export and  
45 suggests rhabditomorph nematode parasites may have co-opted a novel  
46 nematode-unique pathway to communicate with their hosts.

47

## 48 Introduction

49 Small RNA-mediated gene regulatory mechanisms are used by cellular organisms  
50 and viruses to enable various aspects of their development, defence strategies and  
51 physiology (1). In eukaryotes small RNAs (sRNAs) operate within RNA-Induced  
52 Silencing Complexes (RISCs). The engines of these complexes are a diverse  
53 family of Argonaute proteins that are guided by the sRNA to target nucleic acids in  
54 a sequence-specific manner. The downstream effects of sRNA guide-directed  
55 recognition are diverse and depend on the biogenesis of the sRNA guide, the class  
56 of the target and Argonaute with which they both associate. One deeply conserved  
57 sRNA-dependent mechanism is the post-transcriptional regulation of gene  
58 expression by microRNAs (miRNAs), which associate with an Argonaute of the  
59 AGO clade. MiRNAs were discovered for their crucial roles in development and are  
60 now appreciated to regulate numerous aspects of physiology and signalling. In the  
61 last 10 years, studies across a broad range of animal systems have implicated  
62 miRNAs in intercellular communication through their transport in extracellular  
63 vesicles (EVs) (2). Several reports also suggest mammalian miRNAs can move  
64 into other organisms, influencing gene expression and growth of microbes in the  
65 gut (3) and malaria parasites in the blood (4). We previously reported that the  
66 nematode parasite *Heligmosomoides bakeri* (renamed from *Heligmosomoides*  
67 *polygyrus* (5)) releases its own miRNAs within extracellular vesicles (EVs) that are  
68 internalized by mouse cells and suppress innate immune responses (6). *H. bakeri*  
69 is a natural parasite of mice that serves as an important animal model for the study  
70 of immunomodulation by strongylid parasites, which establish chronic infections in  
71 their hosts by inducing immune suppression and tolerance. These parasites infect  
72 half a billion people and are highly prevalent in livestock. The EVs they release  
73 have been shown to be immune suppressive (6, 7), and are targets of protective  
74 immunity, suggesting they are important for parasite survival (8, 9).

75 Our previous proteomic analyses identified one worm (nematode)-specific AGO  
76 (WAGO) in the excretory-secretory products and EVs of *H. bakeri*. Here we focus  
77 on defining and characterizing the extracellular Argonaute (exWAGO) and exported  
78 sRNAs. Nematode pathogens in particular may have evolved a suite of novel RNAi  
79 functions based on a unique expansion of Argonaute types (i.e. the WAGOs) (10).  
80 The majority of our understanding of nematode RNAi pathways is based on the  
81 free-living model organism *Caenorhabditis elegans*, which has at least four types of  
82 endogenous sRNAs and 25 Argonaute genes (11). In addition to miRNAs and  
83 piRNAs, *C. elegans* produces small interfering RNAs (siRNAs) from exogenous or

84 endogenous double-stranded RNAs (dsRNAs). There is also a mechanism for *de*  
85 *novo* generation of siRNAs by RNA-dependent RNA polymerases (RdRPs), which  
86 are recruited to sRNA-target transcripts to amplify the silencing signal through the  
87 generation of secondary siRNAs. The secondary siRNAs dominate the sRNA  
88 content of adult *C. elegans* and have also been documented in several parasitic  
89 nematode species (12-15). They are distinguished from other sRNAs by the  
90 presence of a 5' triphosphate and a preference for a 5' guanine. In *C. elegans*,  
91 secondary siRNAs associate with WAGOs and have been shown to be important in  
92 self *versus* non-self-recognition in the germline (16-18). siRNAs can also be  
93 transmitted from the soma to the germline to mediate heritable responses to  
94 infection and nutrient starvation (19). *C. elegans* therefore sets a precedent for  
95 involvement of WAGOs in both defence and environmental adaptation, but the  
96 functions of most WAGOs and their siRNA guides remain unknown. Since many  
97 nematodes are parasites, and parasitism has arisen multiple times independently  
98 (20) it is possible that WAGOs could also contribute to this important lifestyle  
99 innovation.

100 Here we examine the molecular and evolutionary properties of exWAGO in  
101 parasitic and free-living nematodes and demonstrate that exWAGO mediates the  
102 selective export of specific siRNAs in EVs. We compare the genomic origin of  
103 siRNAs exported in EVs by *H. bakeri* to the resident siRNAs expressed in adults of  
104 both *H. bakeri* and *C. elegans*. Our results support a model where the resident  
105 sRNAs are dominated by secondary siRNAs, which are used for endogenous gene  
106 regulation and control of retrotransposons. In contrast, the parasite preferentially  
107 exports secondary siRNAs that are produced from newly evolved repetitive  
108 elements in the genome that associate with exWAGO. This adds evolutionary  
109 breadth to the handful of reports in mammalian systems suggesting RNA-binding  
110 proteins are a mechanism for selective RNA export (21-23) and establishes *H.*  
111 *bakeri* as a tractable model for studying extracellular sRNA biology.

112

## 113 **Results**

114

### 115 **A nematode-specific extracellular Argonaute is within extracellular vesicles** 116 **released from *H.bakeri* at several copies per EV**

117 We previously identified an Argonaute protein in the excretory-secretory and EV  
118 products of *H. bakeri* based on proteomic analyses (6). Several studies in  
119 mammalian systems have similarly reported Argonautes associated with EVs, in

I20 some cases under specific signalling conditions (24). However, Argonautes have  
I21 also been reported to be contaminants that co-purify with EVs (21). In order to  
I22 rigorously determine whether the exWAGO that we have identified exists within  
I23 EVs, we used ultracentrifugation followed by flotation on a sucrose gradient for  
I24 purification, quantification by nanoparticle tracking analysis and visualisation by  
I25 transmission electron microscopy. As shown in Figure 1, the EVs had a density of  
I26 1.16-1.18 g/cm<sup>3</sup> and co-purified with exWAGO. We further subjected the sucrose-  
I27 purified EV fractions to proteinase K treatment and confirmed that the exWAGO  
I28 was protected from degradation but became susceptible when the EVs were lysed  
I29 with detergent (Figure 1D). We analysed a defined number of sucrose-gradient  
I30 purified EVs by western blot in comparison to recombinant exWAGO and found  
I31 that exWAGO was present at  $3.4 \pm 1.1$  copies per EV (Figure 1E).

### I32 **An improved genome assembly and annotation to explore extracellular** I33 **Argonautes and RNAs**

I34 In order to determine the full complement of Argonautes and small RNAs in *H.*  
I35 *bakeri* we first generated a new genome assembly for this nematode based on  
I36 combining short-read (~100-fold read coverage; Illumina) and long-read (~12-fold  
I37 coverage; PacBio SMRT) data (Supplementary Methods). The final genome  
I38 assembly spans 697 Mb, 150 Mb longer than the first (Illumina-only) draft (25).  
I39 While most sequenced nematode genomes are between 60 and 200 Mb, the  
I40 strongylids (which include *H. bakeri*) tend to have larger genomes, ranging from  
I41 170 to 700 Mb (with a mean of ~380 Mb) (25). Our *H. bakeri* assembly is  
I42 represented by 23,647 contigs (just over half the previous assembly's 44,728  
I43 contigs), with an N50 of 180 kb (up from 36 kb). Assessment of genome  
I44 completeness using the Core Eukaryotic Genes Mapping Approach (CEGMA) and  
I45 Benchmarking Universal Single-Copy Orthologs (BUSCO) suggests ~88% of  
I46 conserved genes are complete (~8% partial), with 96% of the assembled *H. bakeri*  
I47 transcriptome mapping to the genome (Supplemental Table 1). Protein-coding  
I48 genes were predicted with the BRAKER pipeline generating 23,471 protein-coding  
I49 genes with 25,215 transcripts. Non-coding RNA genes, including rRNA, tRNA and  
I50 miRNAs, were predicted using Rfam models and family-specific tools (see  
I51 Supplementary Methods). The expansion of the *H. bakeri* genome compared to  
I52 closely related clade V parasites is associated with an expanded repeat content.  
I53 Over half (58.3%) of the *H. bakeri* genome contains some type of repeat element,  
I54 including LINE elements (12.6% of the genome) and DNA elements (12.8%) (Table  
I55 1). Of all the repeats, 33.3% were found within genes (mostly in introns, which

156 themselves occupy 33.5% of the genome). Interestingly, 30.6% of the genome was  
157 annotated as unclassified repeats, nearly two-thirds of which do not overlap any  
158 other kind of annotation.

159 **exWAGO is highly conserved and abundant in rhabditine (Clade V) parasitic**  
160 **nematodes and has diverged in *Caenorhabditis***

161 To determine the conservation of exWAGO across Clade V nematodes we  
162 clustered proteins from the new *H. bakeri* genome with proteomes predicted from  
163 the genomes of a selection of rhabditomorph nematodes (including *C. elegans* and  
164 six additional *Caenorhabditis* species, eleven strongyle parasites, the  
165 entomopathogen *H. bacteriophora*, the free living *Oscheius tipulae*, and the free-  
166 living diplogasteromorph *Pristionchus pacificus*) using OrthoFinder (26). The  
167 resulting orthogroups were interrogated with Kifin (27) to identify orthologues of  
168 proteins predicted to be involved in RNAi in *H. bakeri* or known to be implicated in  
169 RNAi in *C. elegans*. This revealed that, as expected, nearly all of the machinery for  
170 miRNA and piRNA pathways, including highly conserved Argonautes ALG-1/2 and  
171 PRG1/2, is conserved across Clade V nematodes (Supplemental Figure 1).  
172 Previous studies in *C. elegans* have defined populations of primary siRNAs that are  
173 26 nt in length and associated with male or female germline regulation mediated by  
174 the Argonautes ALG-3/4 (during spermatogenesis) or ERGO-1 (in oocytes and  
175 embryos). Notably ALG-3/4, but not ERGO-1, are conserved in parasites and the  
176 general factors associated with 26G RNA biogenesis, also termed the ERI complex  
177 (enhanced exogenous RNAi phenotype), are conserved while ERGO-1-specific  
178 factors including ERI-6/7/9 and MUT-16 are not (Supplementary Figure 1).

179 Strikingly, of the thirteen WAGOs in the *C. elegans* gene set, only four had co-  
180 clustered orthologues from species other than *Caenorhabditis*. We therefore  
181 performed a joint phylogenetic analysis of all orthogroups containing Argonautes  
182 (defined by the presence of both PAZ and PIWI domains) (Figure 2A). This  
183 identified clades of Argonautes in parasitic species that were sister to  
184 *Caenorhabditis*-specific orthogroups. For example, the nuclear WAGOs HRDE-1  
185 and NRDE-3 as well as WAGO-10 and WAGO-11 in *Caenorhabditis* are in fact  
186 orthologous to parasite-derived Argonautes in orthogroups OG01747 and  
187 OG07955 but their relationship has been obscured by differing rates of evolution in  
188 the different species groups. Similarly, the phylogenetic analysis shows that  
189 exWAGO does in fact co-cluster with a *Caenorhabditis*-only orthogroup that  
190 contains *C. elegans* SAGO-1, SAGO-2 and PPW-1. The orthogroup containing

191 exWAGO contains Argonautes from many other parasitic strongyles, *H.*  
192 *bacteriophora*, *O. tipulae* and *P. pacificus* as well as Argonautes from  
193 *Caenorhabditis* species placed at the base of the genus (*C. monodelphis*, *C.*  
194 *castaneus*, and *C. sp.* 38) (Figure 2B). Examination of the intron-exon structure of  
195 these Argonautes supports this relationship (Figure 2C). The most basal  
196 *Caenorhabditis*, *C. monodelphis*, has a gene structure very similar to that of the  
197 other exWAGOs, but gene structure in other *Caenorhabditis* species has evolved  
198 rapidly. We suggest that *C. elegans* SAGO-1, SAGO-2 and PPW-1 are co-  
199 orthologues of *H. bakeri* exWAGO, and thus the biology of these genes may  
200 illuminate the origins and functions of exWAGO in parasites.

201 Using our new annotation of Argonautes we used existing RNAseq data to  
202 determine the expression levels of all Argonautes in adult life stages of parasitic  
203 versus free-living Clade V nematodes. Strikingly, we found that exWAGOs are  
204 generally the most abundantly expressed of all Argonautes (Supplementary Table  
205 2), including the sheep parasites *Haemonchus contortus* and *T. circumcincta* and  
206 the human hookworm, *Nector americanus* (Figure 3). In contrast, the SAGO-1, 2  
207 and PPW orthologs in *C. elegans* adults are not expressed at high levels  
208 (Supplementary Table 2). We further identified exWAGO in the excretory-secretory  
209 (ES) products of adult *Nippostrongylus brasiliensis* (another rodent parasite) (Table  
210 1). No peptides mapping to any other Argonaute proteins were identified in multiple  
211 samples, pointing to a unique extracellular role for this particular Argonaute across  
212 the parasite species.

### 213 **Comparative analysis of resident sRNA distribution in *H. bakeri* versus *C.*** 214 ***elegans* suggests shared functions in endogenous gene regulation**

215 To determine whether the dominance of exWAGO in the parasites was reflected at  
216 the level of sRNA composition we first carried out side-by-side analysis of  
217 endogenous sRNAs present in *H. bakeri* and *C. elegans* adult nematodes. sRNA  
218 datasets were generated in triplicate, capturing either only 5'-monophosphate  
219 RNAs or all RNAs (after treatment with 5' polyphosphatase). As expected, the  
220 untreated libraries from whole nematodes were dominated by reads mapping to  
221 miRNAs in each genome, having the characteristic first nucleotide preference of U  
222 and peak length of 22 nt (Figure 4A,D). In contrast, the whole-nematode libraries  
223 treated with 5' polyphosphatase showed a clear enrichment for RNAs with a first  
224 base preference of guanine, the majority of which were 22 nt in length in *C.*  
225 *elegans* and 23 nt in *H. bakeri* (Figure 4B,E). This signature is characteristic of

226 secondary siRNA products of RdRPs, and suggests secondary siRNAs dominate  
227 the resident sRNA populations of both nematodes. The length variation (22 *versus*  
228 23 nt) may indicate mechanistic differences between the RdRPs that generate  
229 them or the Argonaute proteins that stabilize them.

230 By comparing the 5' polyphosphatase-treated and untreated libraries in both  
231 species, we identified 137,531 regions in the *H. bakeri* genome that have more  
232 mapped reads from the 5' polyphosphatase-treated libraries (we call these regions  
233 polyP-enriched clusters) and 6,075 regions with relatively more reads from the  
234 untreated libraries (monoP-enriched clusters, see Methods and Supplemental  
235 Figure 2). We reasoned that these represent sRNAs with two distinct modes of  
236 biogenesis, with the monoP-enriched clusters containing sRNAs cleaved by  
237 ribonucleases (such as Dicer) or being degradation products, and the polyP-  
238 enriched clusters containing unprocessed products of RdRPs or RNA polymerase  
239 III. Consistent with this model, the monoP-enriched clusters contained a higher  
240 fraction of miRNA-mapping reads than the untreated libraries, while the polyP-  
241 enriched clusters had a much reduced fraction of miRNA reads (Supplemental  
242 Figure 3). The same general strategy was applied to the *C. elegans* sRNAs, to  
243 compare the polyP-enriched clusters of both nematodes, which represent by far the  
244 most abundant type of sRNA in adults. The majority (62.3%) of the reads within the  
245 polyP-enriched clusters of *C. elegans*, mapped antisense to messenger RNAs,  
246 consistent with roles in regulating endogenous gene expression (Figure 4C). In  
247 contrast, 9.9% of the reads from polyP-enriched clusters of *H. bakeri* mapped  
248 antisense to mRNAs (Figure 4F). To compare these numbers, we need to take into  
249 account the fraction of each genome occupied by mRNAs. The *C. elegans* genome  
250 devotes 28.3% of its base pairs to coding exons (Table 1, Supplemental Figure 4),  
251 therefore if sRNAs were produced randomly across the genome 14.1% would map  
252 antisense to these. Consequently, our observed proportion of antisense mRNA  
253 polyP sRNAs represents a 4.4-fold increase over what is expected by chance.  
254 Since only 3.4% of the *H. bakeri* genome encodes exons, the polyP sRNAs that  
255 map antisense to mRNAs are 5.8-fold more frequent than expected. Following  
256 similar logic, both nematodes have a significant overrepresentation of polyP sRNAs  
257 mapping antisense to known retrotransposons (7.4-fold increase in *C. elegans*, 2.5-  
258 fold increase in *H. bakeri*, Figure 4C,F). Thus, despite the drastic differences in  
259 genome content of the two species, there is a conserved pattern of siRNAs that  
260 likely reflect common functionality in endogenous gene regulation and genome  
261 defence.



262 **Vesicular siRNAs are largely derived from novel-repeat elements and**  
263 **associate with exWAGO**

264 Our previous work indicated that EVs secreted from *H. bakeri* adults are associated  
265 with a population of sRNAs. We characterized miRNAs and Y RNAs, but only  
266 sequenced sRNAs with a 5' monophosphate (6). To generate a more  
267 comprehensive characterization of EV sRNAs and examine selectivity, we  
268 analysed duplicate sRNA datasets from purified EVs, capturing either only 5'-  
269 monophosphate RNAs or all RNAs (after treatment with 5' polyphosphatase). To  
270 ensure the sequenced sRNAs were derived from EVs, and not co-purifying or free  
271 complexes, EVs were purified by ultracentrifugation and sucrose gradient prior to  
272 RNA extraction, library preparation and sequencing. We detected several species  
273 of miRNA in EV-derived libraries as expected from our previous work, however the  
274 vast majority of EV sRNAs are 23G siRNAs, only detected with 5' polyphosphatase  
275 treatment (Figure 4H). To focus on the RdRP products, we selected the polyP-  
276 enriched clusters (Supplemental Figure 2). EV-derived, polyP-enriched sRNAs had  
277 a 1.9-fold enrichment for siRNAs derived from transposons and a 1.7-fold  
278 enrichment for species-specific repeats of the *H. bakeri* genome, compared to the  
279 polyP-enriched sRNAs from adults (Figure 4I). In contrast, the siRNAs mapping  
280 antisense to protein coding genes and retrotransposons were relatively depleted  
281 within the EV libraries. These results suggest selective partitioning of siRNA  
282 biotypes into the EVs and identifies recently evolved regions of the genome as a  
283 primary source of EV sRNA.

284 To further explore and quantify this selectivity, we calculated, for each polyP-  
285 enriched cluster, a measure of entropy-based Information Content (IC) using either  
286 adult or EV reads (see Methods). The higher the IC value, the more concentrated  
287 the reads are in a few peaks, while the lower the IC value, the more evenly  
288 distributed the reads are across the cluster (e.g. Figure 5A, inset). Interestingly, the  
289 IC values are consistently higher for reads coming from EVs than from adult  
290 libraries (Figure 5A), indicating that the EVs more often contain reads from specific  
291 peaks and are not a random sampling of the adult sRNA pool. Figure 5B illustrates  
292 a region in the *H. bakeri* genome that produces siRNAs enriched in the EVs. The  
293 only annotated elements in this region are repeats, mostly novel (species-specific)  
294 elements. These results support the idea that EV content reflects a selection of  
295 specific siRNA sequences.

296 To determine whether exWAGO specifically associates with the EV-enriched  
297 sRNAs produced from novel repeats, we immunoprecipitated the adult nematode  
298 lysates using an antibody raised against exWAGO and analysed by qRT-PCR the  
299 co-purified sRNAs. The siRNAs that derive from EV-enriched clusters  
300 immunopurified with exWAGO and were depleted in the unbound fraction (Figure  
301 6). We observed the opposite pattern with the IgG bead control. In contrast,  
302 siRNAs derived from selected clusters that are abundant in adults but not  
303 represented in the EVs did not copurify with exWAGO, nor did Y RNAs or a  
304 conserved miRNA (Figure 6). These results suggest that specific siRNA sequences  
305 bind to exWAGO, which mediates their encapsulation in EVs and defines the  
306 population of vesicular sRNAs that are secreted into the host environment.

### 307 **Discussion**

308  
309 That small RNAs are transferred within organisms, and between organisms, has  
310 many implications in cross-species communication and disease. However, there  
311 are many questions regarding how RNAs are selected for export from the donor,  
312 which RNAs are transferred to the recipient, and whether and how these RNAs  
313 function within the recipient. Here we have examined the question of the specificity  
314 of packaging of sRNAs in EVs in the model parasite *H. bakeri* using comparative  
315 analyses of the origin of sRNAs within the body of the nematode *versus* those  
316 selected to be exported in EVs. We compare this to evolutionary analyses of the  
317 sRNA machinery in the parasite and the closely related, free-living *C. elegans*. We  
318 find that secondary siRNAs within adults of both the free-living and the parasitic  
319 nematodes are largely produced to target mRNAs and retrotransposons by  
320 antisense pairing along their entire length, and are therefore associated with  
321 endogenous gene regulation and defence. In contrast the siRNAs within EVs  
322 secreted by the parasite do not appear to be a stochastic sampling of those  
323 detected in the adult nematodes but are specifically enriched for those produced  
324 from transposons and newly-evolved, repetitive regions in the genome. This  
325 suggests both mechanistic and evolutionary selectivity.

326 Our immunoprecipitation experiments show that Y RNAs, which are also abundant  
327 in EVs (6), do not associate with exWAGO, suggesting this protein is specific for  
328 siRNAs. Mechanistically, we envision three processes that could contribute to the  
329 total RNA present in EVs, acting independently or together. The EVs could be  
330 passively loaded with the sRNAs present in the cell type from which EVs are  
331 exported. It is likely that EVs are released from the intestine (6). Secondly, the

332 sRNAs could be actively loaded by some intrinsic property, perhaps related to their  
333 specific biogenesis pathway. Lastly, the sRNAs could associate with a specific  
334 RNA-binding protein, as has been shown in some mammalian systems. Our  
335 immunoprecipitation data suggest that associative binding occurs for the siRNAs  
336 and we identify exWAGO as the mediator of this selective export. Intriguingly  
337 exWAGO is highly conserved and abundant in all Clade V parasitic nematodes  
338 examined, and we have further shown that it is also secreted in the rodent parasitic  
339 nematode *N.brasiliensis*. We propose therefore that the mechanism of exWAGO-  
340 mediated siRNA export extends beyond the *H. bakeri* model.

341 The sRNAs selected for export with exWAGO derive from regions of the *H. bakeri*  
342 genome that are repetitive and novel, which may reflect recent, dynamic evolution  
343 of this putative host manipulation system. Rather than derive sRNAs from  
344 conserved loci, and risk self-directed effects, selection may exploit the rapidly  
345 evolving non-genic portion of the genome to generate evolutionarily novel but host-  
346 relevant sRNA loci. It will be informative to correlate these sequences with host  
347 genes and to explore their evolution across parasites.

348 We identified the SAGO and PPW proteins in *C. elegans* and related  
349 *Caenorhabditis* species as diverged exWAGO orthologues. Although as yet we  
350 have no evidence that the SAGOs (or any other AGOs) are exported extra-  
351 organismally from *C. elegans*, preliminary data suggest these may both have  
352 common localization in the intestine ((6) and Claycomb, Seroussi, unpublished). It  
353 will be of interest to understand whether SAGO and PPW function within *C.*  
354 *elegans* can shed light on the roles of exWAGO.

355 Very little is understood regarding the evolution of cross-species communication.  
356 That pathogens use small RNAs to modulate their hosts is not unexpected, as it  
357 has been well documented in interactions between parasitic fungi and plants (28)  
358 and it is similar, conceptually, to the evolution of miRNAs in certain viruses (29). In  
359 contrast to viruses, however, extracellular parasites such as *H. bakeri* require a  
360 mechanism for transporting specific sRNAs into host cells. The packaging of  
361 siRNAs in EVs by exWAGO provides such a mechanism. Notably, EVs have  
362 recently been implicated in the transfer of RNA in plants, in this case from the plant  
363 cells to fungal parasites (30). We do not yet know if exWAGO is solely involved in  
364 export, or is also involved in mediating functional effects inside the recipient cells.  
365 Further work is required to understand the individual and collective contributions of  
366 all of the EV cargos in host cell modulation. This work establishes a parasite

367 Argonaute as a sorting mechanism for EV RNAs, indicates that focusing only on  
368 miRNAs can be misleading and provides an important framework for interrogating  
369 new parasite-host interactions and their consequences on infection.

370

371

372 **Materials and Methods are provided in Supplementary Material.**

373

374 **Acknowledgements**

375 This work was supported by HFSP grant RGY0069 to AB, CA and JC. We thank  
376 Elaine Robertson for technical support for the *H. bakeri* life cycle, Sujai Kumar for  
377 support with genome analysis, Tuhin Maity for preparation of *C. elegans* samples  
378 and Rick Maizels for ES from *N. brasiliensis*.

379 **Competing interests**

380 The authors declare no competing interests.

381 **Figure legends**

382

383 **Figure 1: exWAGO is vesicular and present at multiple copies per EV**

384 A) Western blot analysis of equal volumes of sucrose-gradient fractions of EVs  
385 from *H. bakeri* using antibody against exWAGO, B) Silver stain blot of same  
386 fractions, C) Nanoparticle tracking analysis of EV total number in each fraction (left)  
387 and TEM of 1.16 g/cm<sup>3</sup> fraction (right). D) Western blot of exWAGO from gradient-  
388 purified EVs and following treatment with Proteinase K (5 ug/mL) with or without  
389 Triton-X (0.05%). E) Western blot of 3 independent biological replicates of sucrose-  
390 gradient purified *H. bakeri* EVs, using recombinant standard of exWAGO for  
391 quantification.

392 **Figure 2: Phylogenetic tree of Argonautes in Clade V nematodes and gene**

393 **structure of exWAGO.** A) Grey shading denotes different orthogroups, *C. elegans*

394 protein names in each clade are noted (or absent if no orthologues in that Clade).

395 B) Tree showing phylogenetic relationship and branch lengths of exWAGO

396 orthologues across Clade V, C) Conservation of exons and introns in exWAGO

397 homologues. Each box is an exon with the width denoting length. Boxes with

398 dashed lines denote exons with possible errors in the genome assembly of the

399 species. Colours denote differences in exon size in triplets compared to exWAGO.

400 **Figure 3: Expression of Argonautes across Clade V parasitic nematodes**

401 Relative expression levels of Argonautes from RNAseq data of the adult parasites

402 noted. Data were based on the sum of tpm reads for each orthogroup (defined in

403 Figure 2), normalized to tpm for OG1273 orthogroup (ALG-1/2). The total number

404 of distinct transcripts in each orthogroup in each species is noted below each

405 column. The known *C.elegans* Argonaute names are used where applicable, or  
406 exWAGO as defined in this work.

407 **Figure 4: sRNA composition in adult *C. elegans* and *H. bakeri*, compared to**  
408 ***H. bakeri* extracellular vesicles.** First nucleotide and length distribution of  
409 untreated small RNA libraries for *C. elegans* adults (A), *H. bakeri* adults (D) and *H.*  
410 *bakeri* EVs (G), and their corresponding polyphosphatase-treated libraries (B,E,H).  
411 The proportions of the 20-25 nt reads mapping within annotated categories in the  
412 genome (from Table 1) are shown beneath each barplot. Line plots for *C. elegans*  
413 (C) and *H. bakeri* (F) showing the relationship between the percentage of the  
414 genome occupied by each annotation category and the percentage of 20-25 nt  
415 reads from the polyP-enriched clusters, while (I) shows the relationship between  
416 the percentage of the 20-25 nt reads from the adult polyP-enriched clusters to  
417 those from the EV polyP-enriched clusters (see Methods).

418 **Figure 5: Clusters with transposons or novel repeats have higher Information**  
419 **Content in extracellular vesicles than in adults.** Dot plot comparing Counts Per  
420 Million and Information Content of all clusters with transposons or novel repeats  
421 (A). Top and side barplots show the number of clusters at each value of the X or Y-  
422 axis respectively. Inset: example of read coverage for cluster ncRNA\_44089. Read  
423 coverage (top), annotation of repeat elements (middle) and zoomed-in read  
424 coverage (bottom, in log<sub>2</sub>-scale to distinguish individual libraries) for the most highly  
425 expressed cluster in EVs (B). In all cases blue indicates EV and red indicates Adult  
426 libraries.

427 **Figure 6: Immunoprecipitation of exWAGO and detection of associated**  
428 **sequences.** A) Western blot to detect exWAGO following immunoprecipitation of  
429 10 ug adult worm lysates with exWAGO anti sera or control (naïve) sera.  
430 Equivalent volumes input and unbound were loaded (unbound is defined as first  
431 flow-through from beads). B) qRT-PCR analysis of samples from (A) for siRNAs  
432 derived from EV-enriched or adult-enriched clusters as well as Y-RNA and miR-  
433 100. To ensure equivalent recovery of RNA, a synthetic spike was included prior to  
434 extraction which varied <2 fold across all sample types. Data are shown as mean  
435 with standard deviation for n=3.

436

437

438

439 **Supplementary Figure 1 Conservation of RNAi pathway in Clade V**

440 Presence or absence of orthologues to *C. elegans* genes associated with RNAi  
441 pathways in Clade V organisms. Phylogenetic relationship is shown at the top of  
442 table, gene identities across each species are detailed in  
443 <https://github.com/DRL/chow2018>.

444

445 **Supplementary Figure 2:** Expression of all sRNA clusters (dots) comparing the  
446 average counts-per-million (X-axis) to the fold-change of polyphosphatase-treated  
447 relative to untreated libraries (Y-axis). Blue and red dots highlight those clusters  
448 identified respectively as polyP (enriched in polyphosphatase treated libraries) or  
449 monoP (similar normalised expression between treated and untreated libraries) for  
450 *C. elegans* adult nematodes (A), and *H. bakeri* adults (B) or extracellular vesicles  
451 (C). Clusters containing known miRNAs (expected to be monoP) are highlighted in  
452 gold.

453 **Supplementary Figure 3:** Distribution of reads in annotated categories for each  
454 type of library, comparing the reads falling within monoP or polyP clusters to all  
455 reads. Plots are shown for untreated libraries for *C. elegans* (A) and *H. bakeri* (B),  
456 and polyphosphatase-treated libraries for *C. elegans* (C) and *H. bakeri* (D).

457 **Supplementary Figure 4:** Comparison of *C. elegans* and *H. bakeri* genome sizes  
458 and fractions of each genome devoted to annotated.

459 **Supplementary Table 1:** New *H.bakeri* genome assembly information

460 **Supplementary Table 2:** Details of RNAseq data used for Figure 3

461

462

463

464

465 **Table 1. Non-overlapping genome composition**

|                   | <i>C. elegans</i>  |             | <i>H. bakeri</i>   |             |
|-------------------|--------------------|-------------|--------------------|-------------|
|                   | bases              | %           | bases              | %           |
| intergenic        | 29,355,343         | 29.272      | 168,174,849        | 24.130      |
| exons             | 28,409,938         | 28.329      | 23,682,169         | 3.398       |
| introns           | 25,956,467         | 25.882      | 170,798,580        | 24.506      |
| transposons       | 11,880,919         | 11.847      | 92,998,044         | 13.343      |
| novel repeats     | 1,402,898          | 1.399       | 13,1452,375        | 18.861      |
| retroelements     | 1,307,772          | 1.304       | 104,917,538        | 15.054      |
| satellite repeats | 594,478            | 0.593       | 377,947            | 0.054       |
| simple repeats    | 581,880            | 0.580       | 2,960,599          | 0.425       |
| other ncRNA       | 429,956            | 0.429       | 749,784            | 0.108       |
| piRNA             | 256,574            | 0.256       | 63,990             | 0.009       |
| tRNA              | 62,284             | 0.062       | 675,650            | 0.097       |
| miRNA             | 35,312             | 0.035       | 43,955             | 0.006       |
| rRNA              | 9,520              | 0.009       | 53,983             | 0.008       |
| yRNA              | 3,060              | 0.003       | 5,940              | 0.001       |
| <b>TOTAL</b>      | <b>100,286,401</b> | <b>100%</b> | <b>696,955,403</b> | <b>100%</b> |

466



467 **Table 2. ExWAGO identified in EV products by mass spectrometry**

| Species                | Protein | Accession number       | Length (aa) | Predicted MW (kDa) | Predicted PI | Unique peptide sequence (Start position) |
|------------------------|---------|------------------------|-------------|--------------------|--------------|------------------------------------------|
| <i>H. bakeri</i>       | exWAGO  | HPOL_0000298601-mRNA-1 | 912         | 102                | 9.23         | TGMGQLSVGAVALPEKR (6)                    |
|                        |         |                        |             |                    |              | SAAVAVYK (86)                            |
|                        |         |                        |             |                    |              | AAVLFSAGR (114)                          |
|                        |         |                        |             |                    |              | QFMLPASVSSAGPDATGIR (132)                |
|                        |         |                        |             |                    |              | ISQMSIFFDQR (277)                        |
|                        |         |                        |             |                    |              | NAMQPFNQK (297)                          |
|                        |         |                        |             |                    |              | VTLQQQTPDQVSMIK (393)                    |
|                        |         |                        |             |                    |              | ASATLPQTR (409)                          |
|                        |         |                        |             |                    |              | IMKDALDITPR (423)                        |
|                        |         |                        |             |                    |              | AATTIAPR (716)                           |
| <i>N. brasiliensis</i> | exWAGO  | NBR_exWAGO             | 913         | 102                | 9.25         | LVNDGDLK (899)                           |
|                        |         |                        |             |                    |              | QDFVCNLTALK (32)                         |
|                        |         |                        |             |                    |              | DIFPQDSALFYDR (102)                      |
|                        |         |                        |             |                    |              | ILPTPTILYGER (457)                       |

468 **References**

469

- 470 1. Swarts DC, *et al.* (2014) The evolutionary journey of Argonaute proteins.  
471 *Nature structural & molecular biology* 21(9):743-753.
- 472 2. Tkach M & Thery C (2016) Communication by Extracellular Vesicles: Where  
473 We Are and Where We Need to Go. *Cell* 164(6):1226-1232.
- 474 3. Liu S, *et al.* (2016) The Host Shapes the Gut Microbiota via Fecal  
475 MicroRNA. *Cell host & microbe* 19(1):32-43.
- 476 4. LaMonte G, *et al.* (2012) Translocation of sickle cell erythrocyte microRNAs  
477 into Plasmodium falciparum inhibits parasite translation and contributes to  
478 malaria resistance. *Cell host & microbe* 12(2):187-199.
- 479 5. Behnke JM, Menge DM, & Noyes H (2009) Heligmosomoides bakeri: a  
480 model for exploring the biology and genetics of resistance to chronic  
481 gastrointestinal nematode infections. *Parasitology* 136(12):1565-1580.
- 482 6. Buck AH, *et al.* (2014) Exosomes secreted by nematode parasites transfer  
483 small RNAs to mammalian cells and modulate innate immunity. *Nature*  
484 *communications* 5:5488.
- 485 7. Eichenberger RM, *et al.* (2018) Hookworm Secreted Extracellular Vesicles  
486 Interact With Host Cells and Prevent Inducible Colitis in Mice. *Frontiers in*  
487 *immunology* 9:850.
- 488 8. Coakley G, *et al.* (2017) Extracellular Vesicles from a Helminth Parasite  
489 Suppress Macrophage Activation and Constitute an Effective Vaccine for  
490 Protective Immunity. *Cell reports* 19(8):1545-1557.
- 491 9. Shears RK, Bancroft AJ, Hughes GW, Grecis RK, & Thornton DJ (2018)  
492 Extracellular vesicles induce protective immunity against Trichuris muris.  
493 *Parasite immunology*:e12536.
- 494 10. Buck AH & Blaxter M (2013) Functional diversification of Argonautes in  
495 nematodes: an expanding universe. *Biochemical Society transactions*  
496 41(4):881-886.
- 497 11. Youngman EM & Claycomb JM (2014) From early lessons to new frontiers:  
498 the worm as a treasure trove of small RNA biology. *Frontiers in genetics*  
499 5:416.
- 500 12. Holz A & Streit A (2017) Gain and Loss of Small RNA Classes-  
501 Characterization of Small RNAs in the Parasitic Nematode Family  
502 Strongyloididae. *Genome biology and evolution* 9(10):2826-2843.
- 503 13. Pak J & Fire A (2007) Distinct populations of primary and secondary  
504 effectors during RNAi in C. elegans. *Science* 315(5809):241-244.
- 505 14. Sarkies P, *et al.* (2015) Ancient and novel small RNA pathways compensate  
506 for the loss of piRNAs in multiple independent nematode lineages. *PLoS*  
507 *biology* 13(2):e1002061.
- 508 15. Yigit E, *et al.* (2006) Analysis of the C. elegans Argonaute family reveals  
509 that distinct Argonautes act sequentially during RNAi. *Cell* 127(4):747-757.
- 510 16. Ashe A, *et al.* (2012) piRNAs can trigger a multigenerational epigenetic  
511 memory in the germline of C. elegans. *Cell* 150(1):88-99.
- 512 17. Lee HC, *et al.* (2012) C. elegans piRNAs mediate the genome-wide  
513 surveillance of germline transcripts. *Cell* 150(1):78-87.
- 514 18. Shirayama M, *et al.* (2012) piRNAs initiate an epigenetic memory of nonself  
515 RNA in the C. elegans germline. *Cell* 150(1):65-77.
- 516 19. Rechavi O & Lev I (2017) Principles of Transgenerational Small RNA  
517 Inheritance in Caenorhabditis elegans. *Current biology : CB* 27(14):R720-  
518 R730.
- 519 20. Blaxter ML, *et al.* (1998) A molecular evolutionary framework for the phylum  
520 Nematoda. *Nature* 392(6671):71-75.

- 521 21. Shurtleff MJ, Temoche-Diaz MM, Karfilis KV, Ri S, & Schekman R (2016) Y-  
522 box protein 1 is required to sort microRNAs into exosomes in cells and in a  
523 cell-free reaction. *eLife* 5.
- 524 22. Santangelo L, *et al.* (2016) The RNA-Binding Protein SYNCRIP Is a  
525 Component of the Hepatocyte Exosomal Machinery Controlling MicroRNA  
526 Sorting. *Cell reports* 17(3):799-808.
- 527 23. Villarroya-Beltri C, *et al.* (2013) Sumoylated hnRNPA2B1 controls the  
528 sorting of miRNAs into exosomes through binding to specific motifs. *Nature*  
529 *communications* 4:2980.
- 530 24. McKenzie AJ, *et al.* (2016) KRAS-MEK Signaling Controls Ago2 Sorting into  
531 Exosomes. *Cell reports* 15(5):978-987.
- 532 25. Consortium IHG (2018) Comparative genomics of the major parasitic  
533 worms. *bioRxiv* 36539; doi: <https://doi.org/10.1101/236539>.
- 534 26. Emms DM & Kelly S (2015) OrthoFinder: solving fundamental biases in  
535 whole genome comparisons dramatically improves orthogroup inference  
536 accuracy. *Genome biology* 16:157.
- 537 27. Laetsch DR & Blaxter ML (2017) KinFin: Software for Taxon-Aware  
538 Analysis of Clustered Protein Sequences. *G3* 7(10):3349-3357.
- 539 28. Weiberg A, *et al.* (2013) Fungal small RNAs suppress plant immunity by  
540 hijacking host RNA interference pathways. *Science* 342(6154):118-123.
- 541 29. Pfeffer S, *et al.* (2004) Identification of virus-encoded microRNAs. *Science*  
542 304(5671):734-736.
- 543 30. Cai Q, *et al.* (2018) Plants send small RNAs in extracellular vesicles to  
544 fungal pathogen to silence virulence genes. *Science* 360(6393):1126-1129.

545

546

## Figure 1

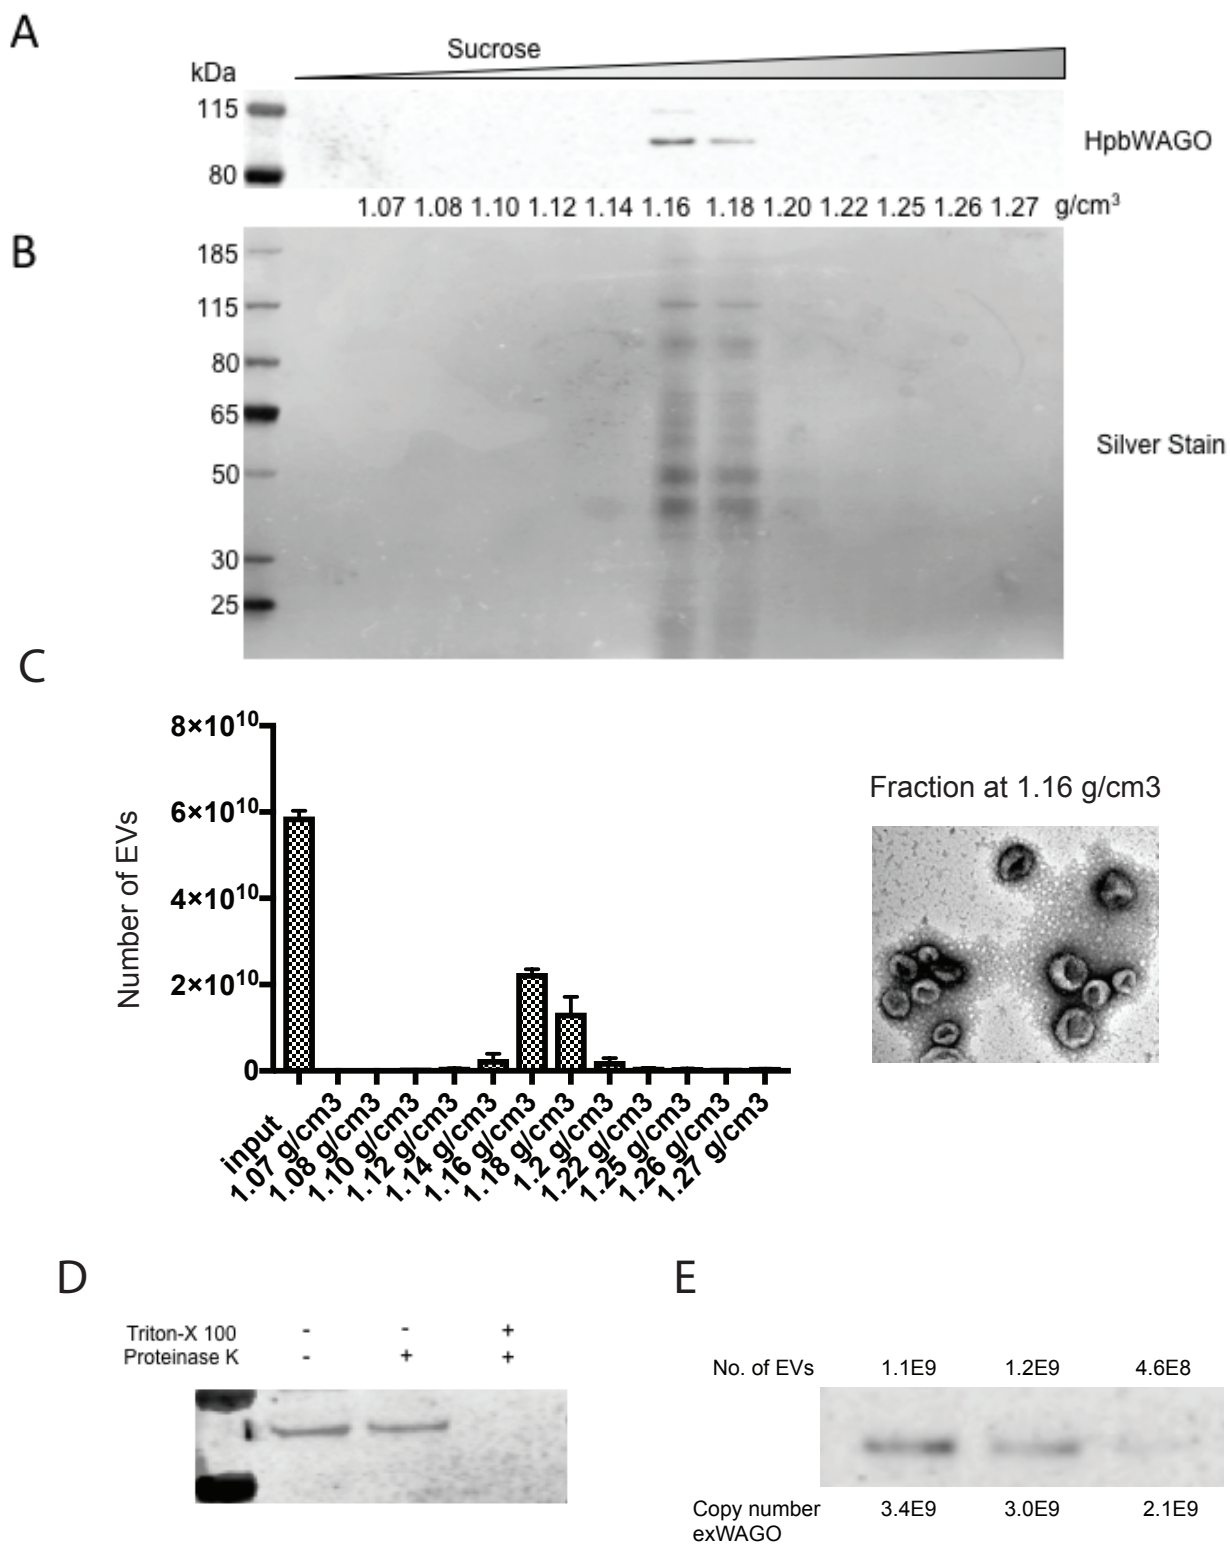



Figure 3

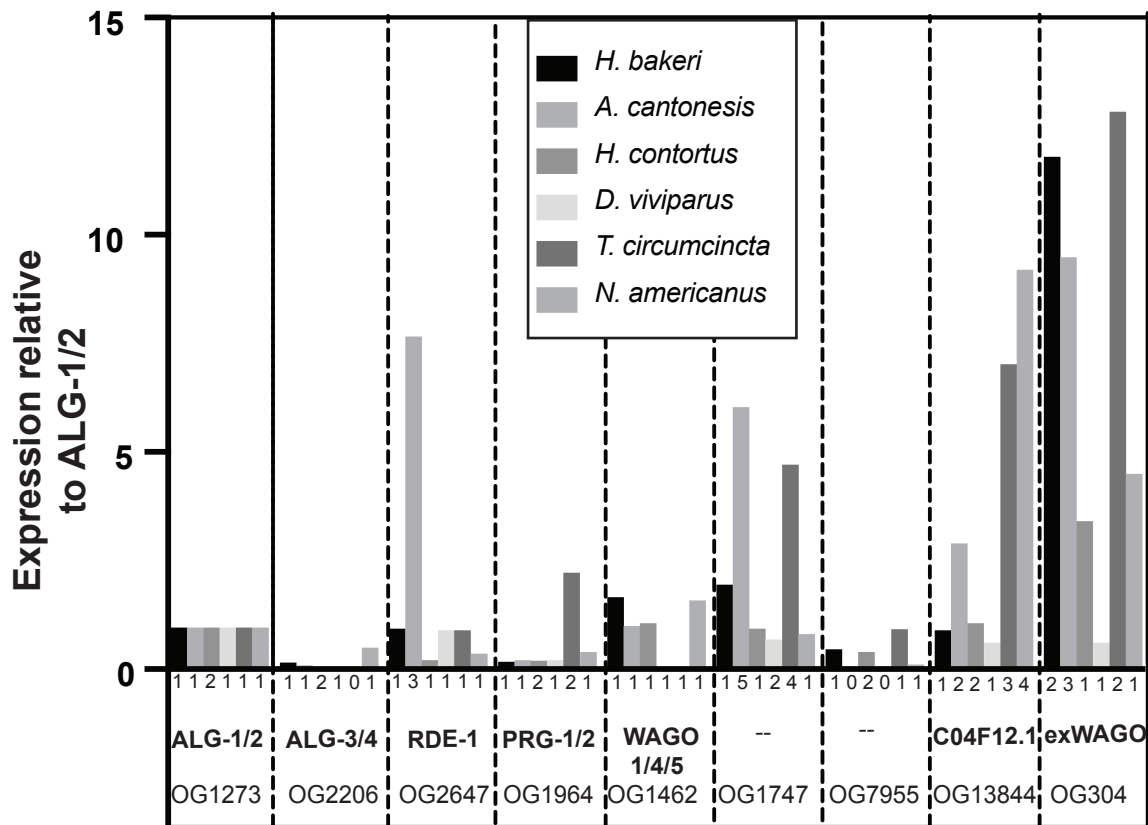

**Figure 4*****C. elegans*, adult libraries**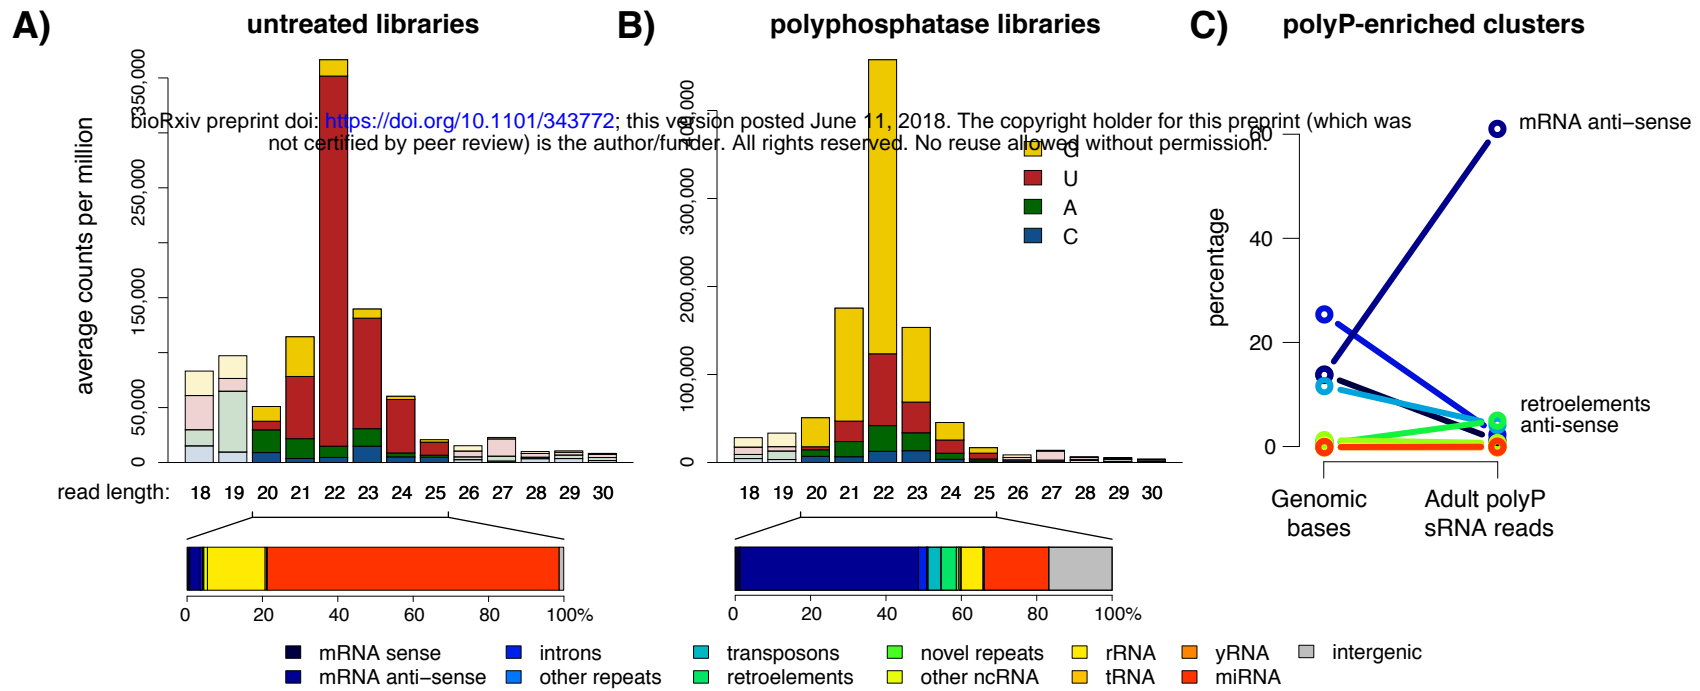***H. bakeri*, adult libraries**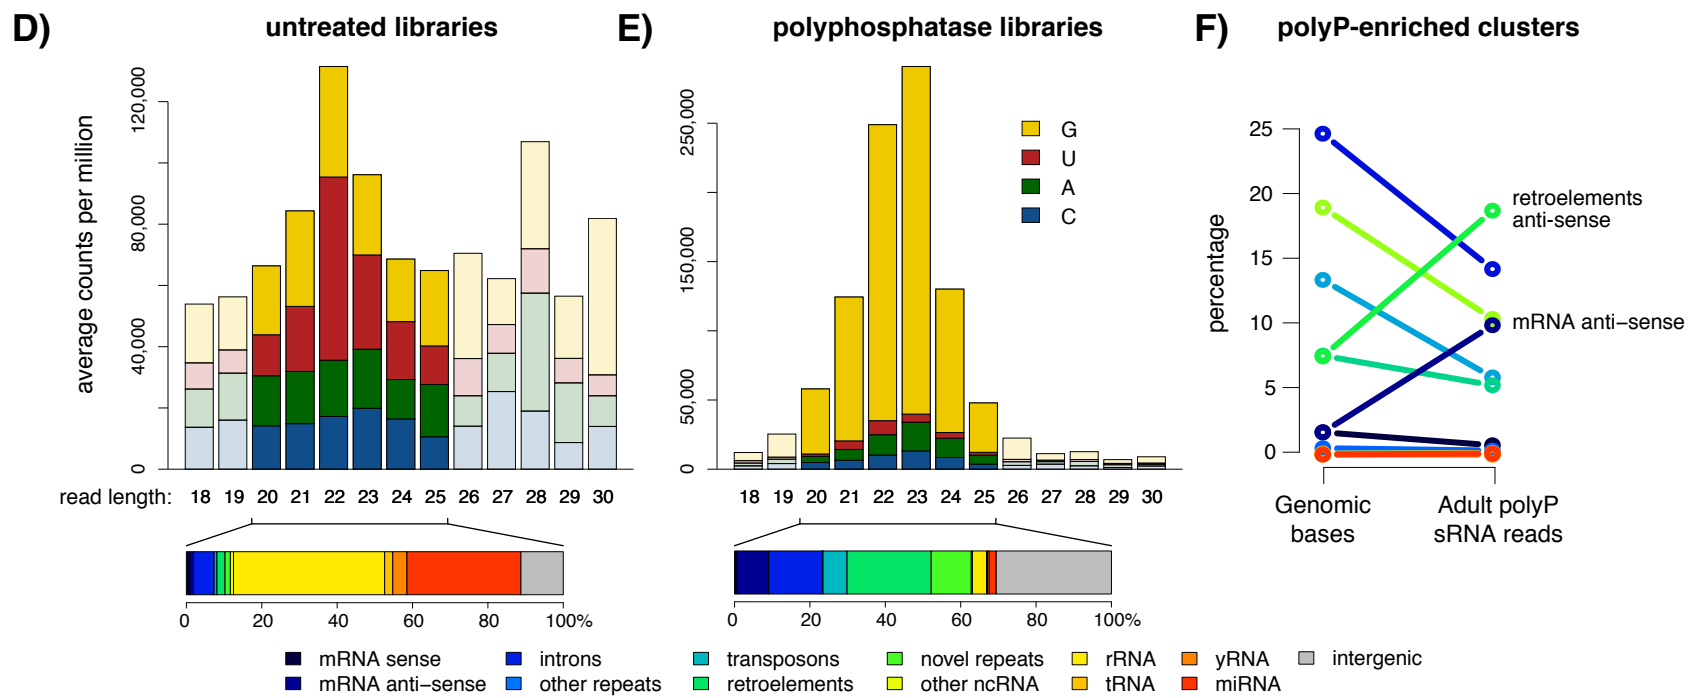***H. bakeri*, vesicle libraries**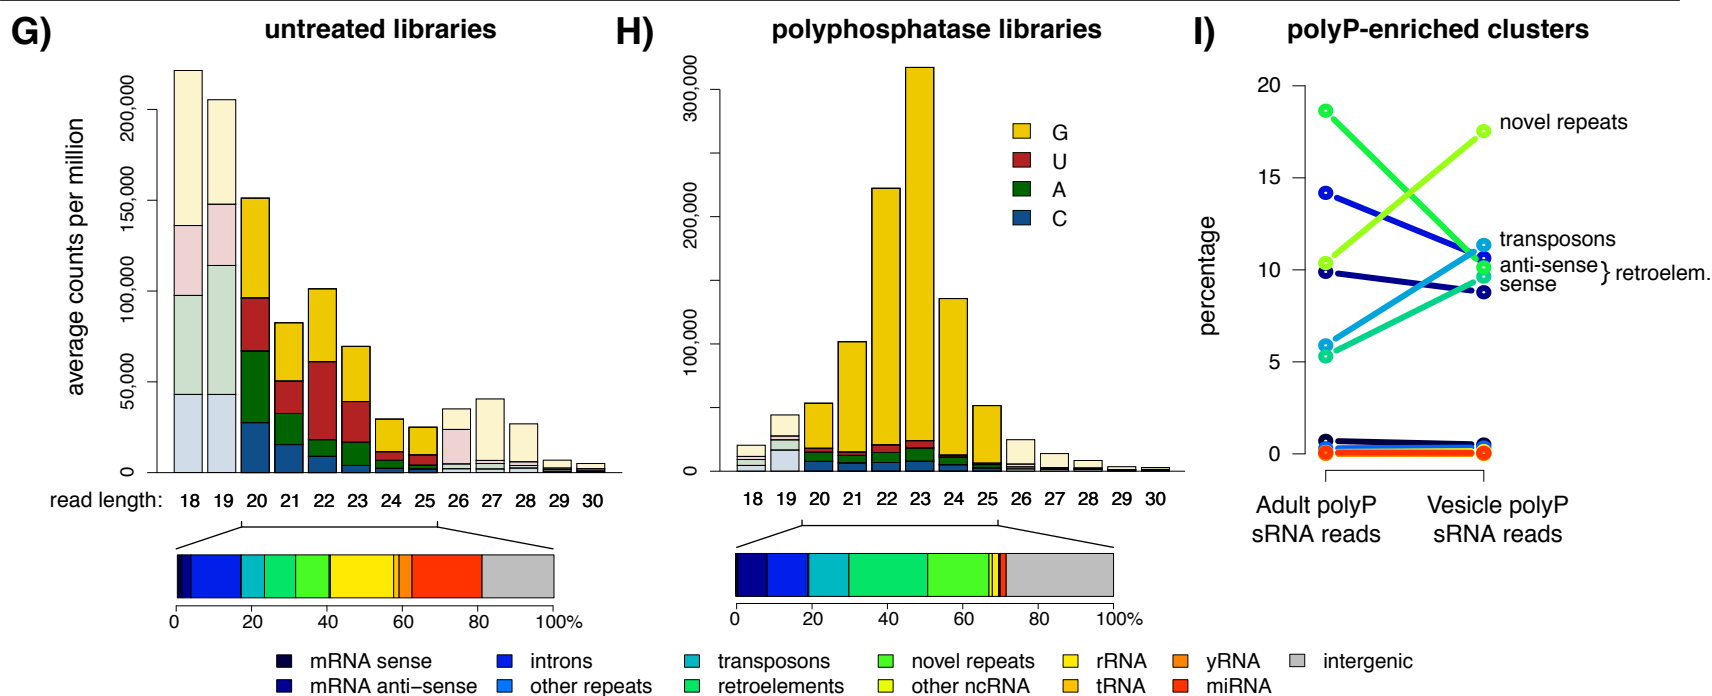

**Figure 5**

**A) Information Content of clusters with transposons or novel repeats**

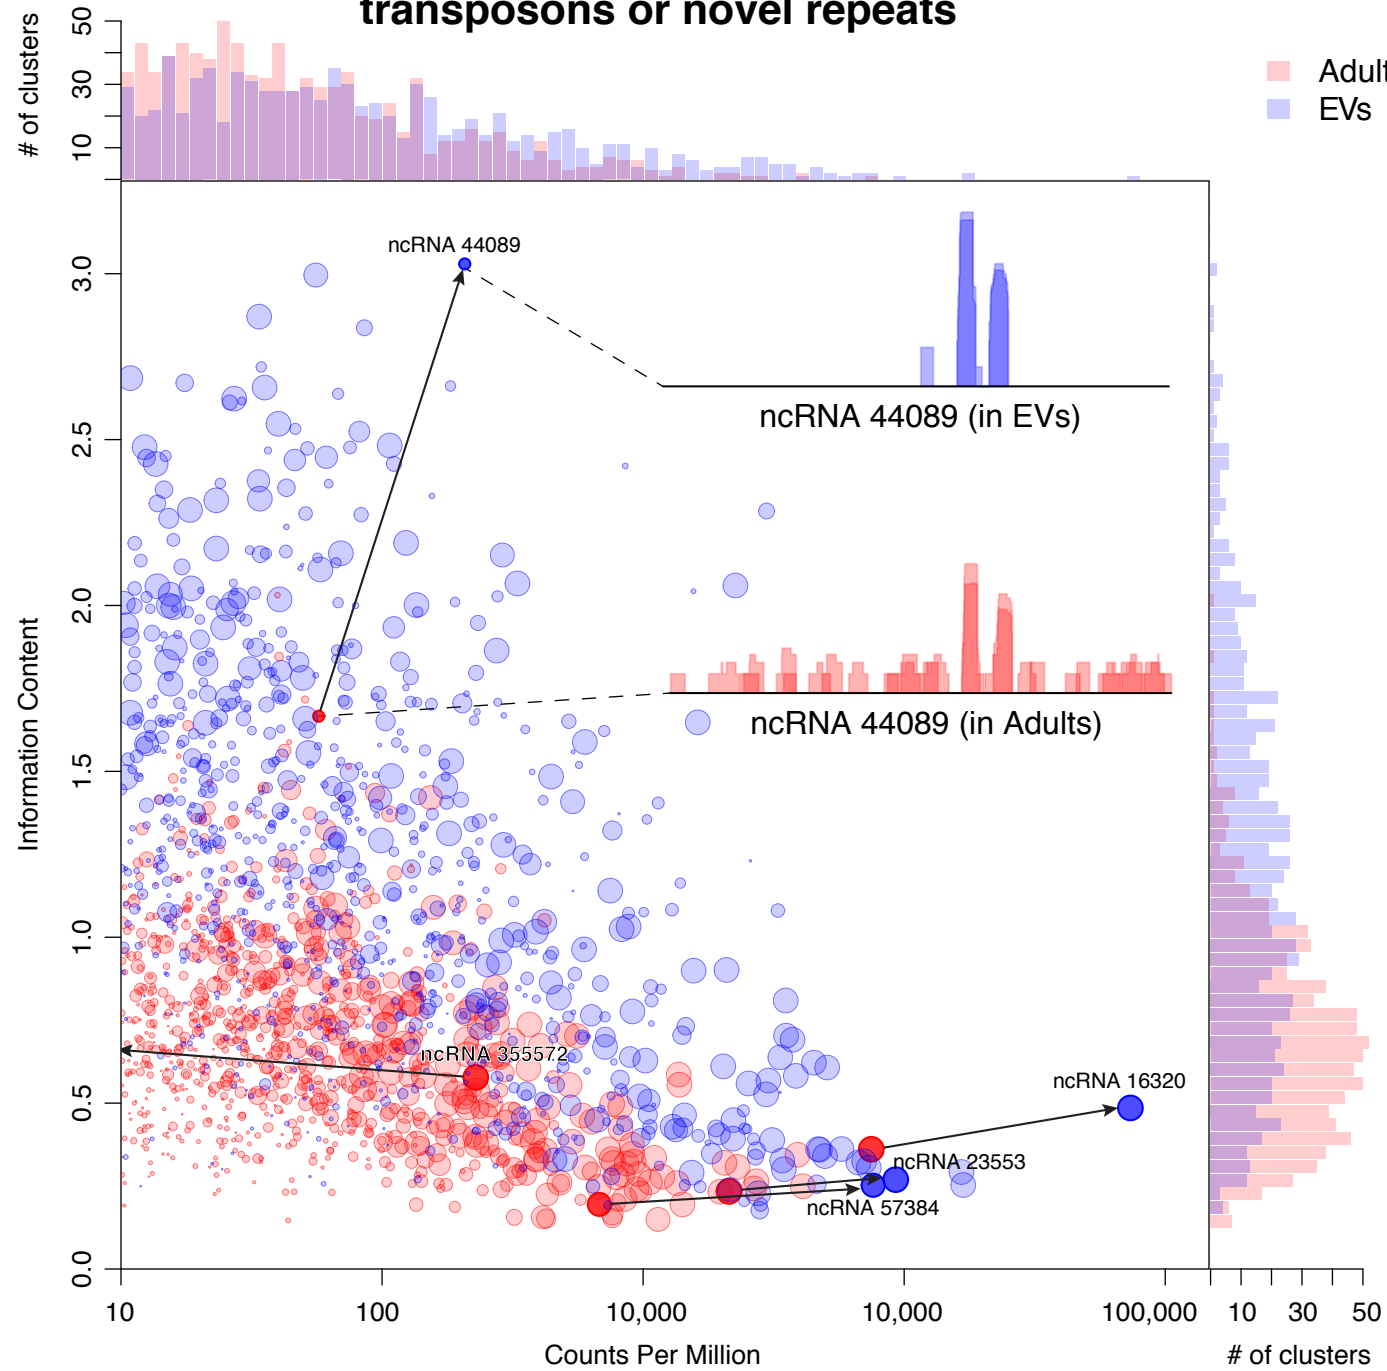

**B) Read coverage and genome annotation for cluster ncRNA 16320**

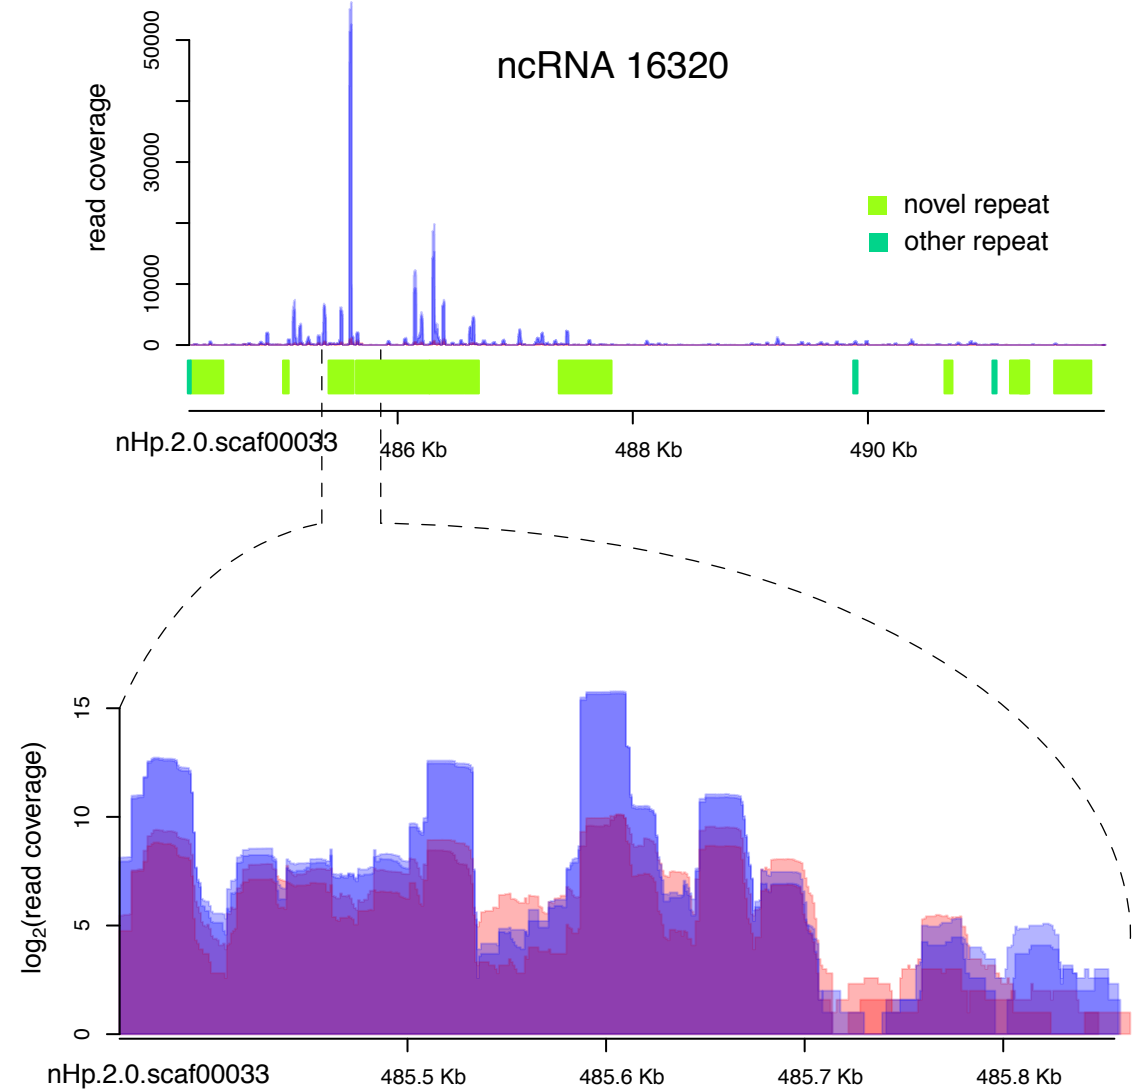



## Figure 6

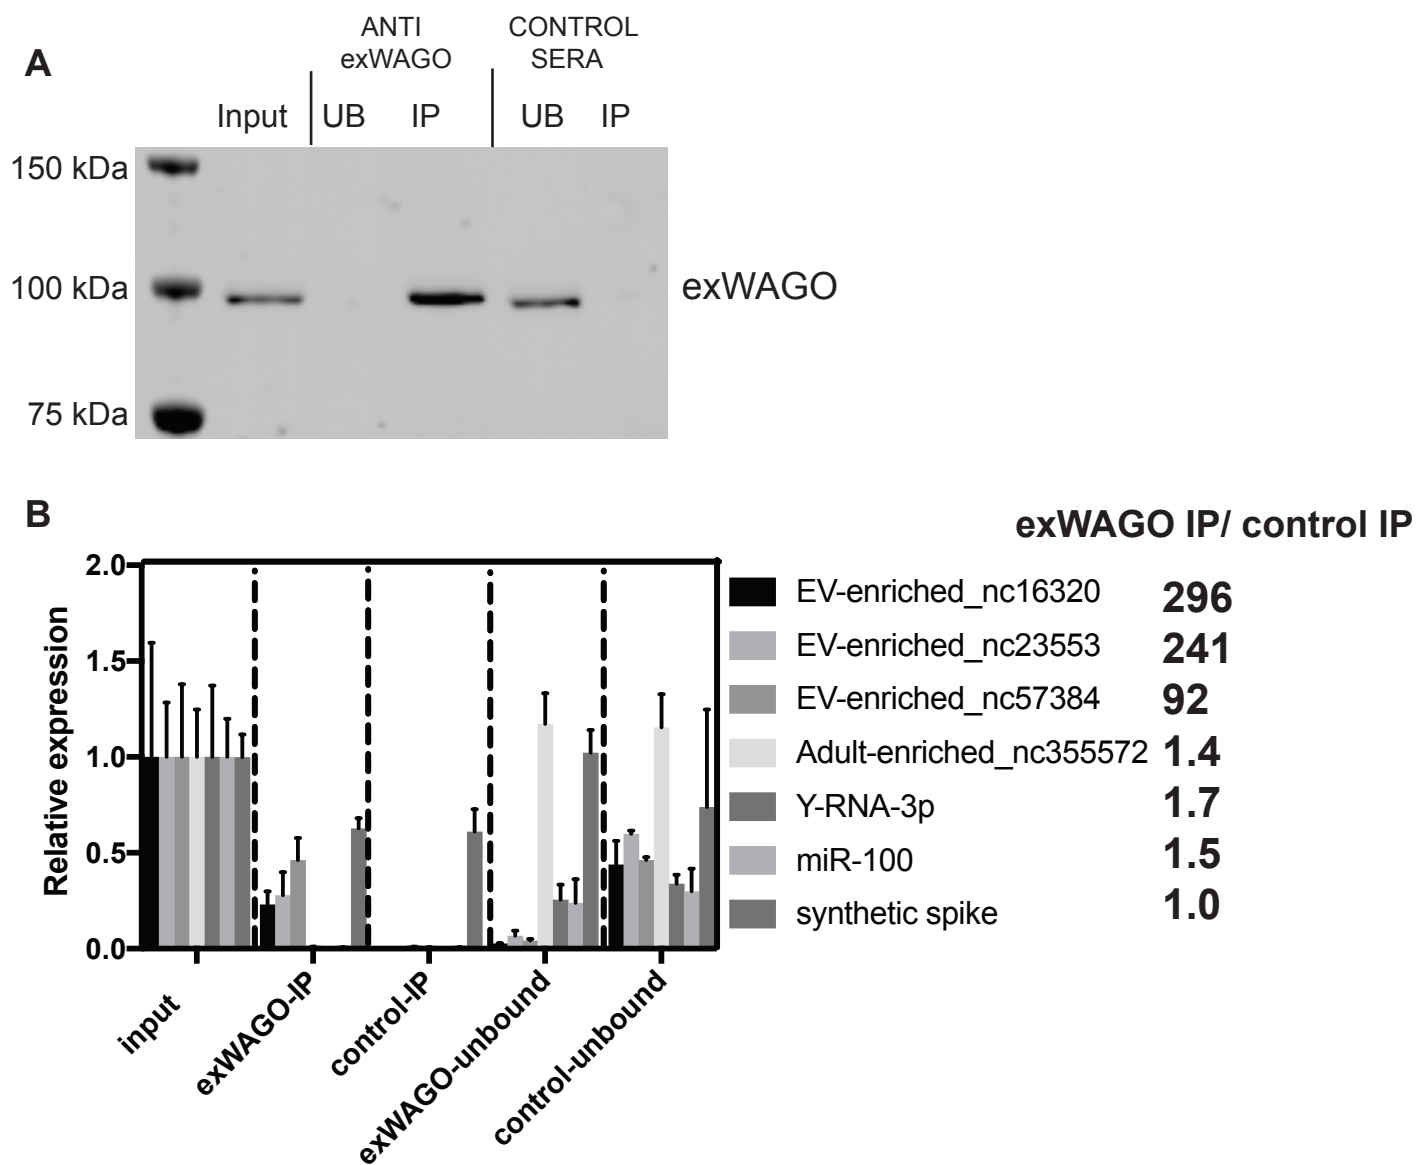



## Supplemental Figure 2

### A) *C. elegans* Adult libs, monoP and polyP-enriched clusters

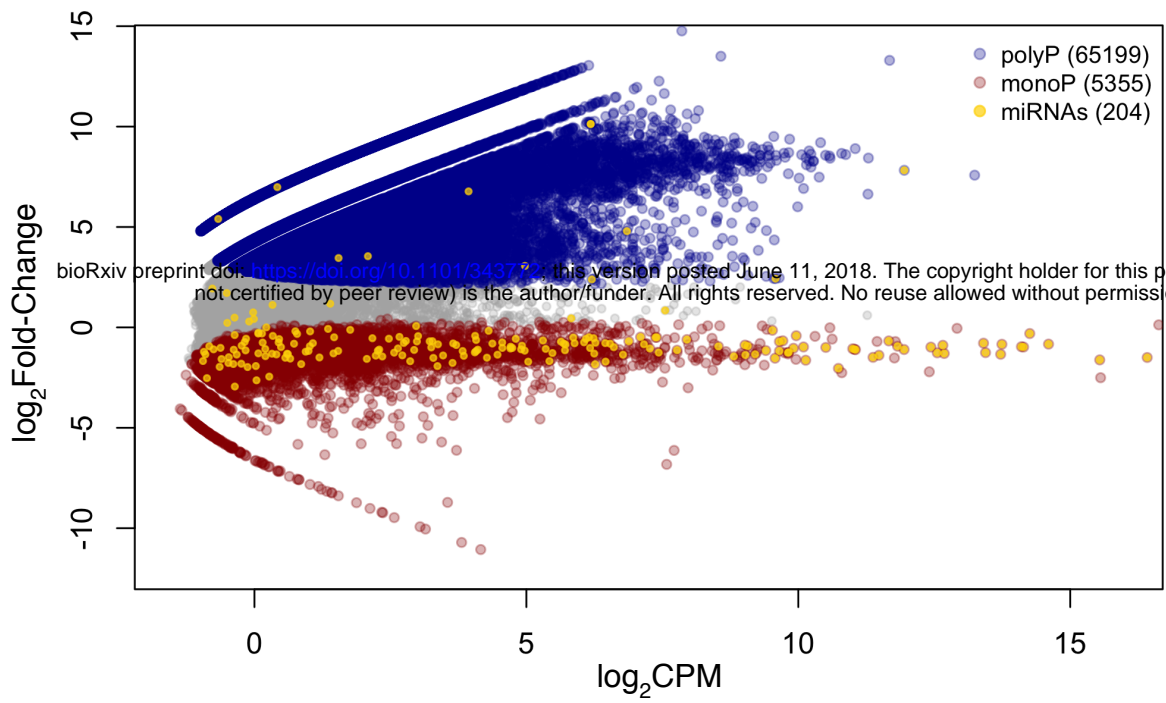

### B) *H. bakeri* Adult libs, monoP and polyP-enriched clusters

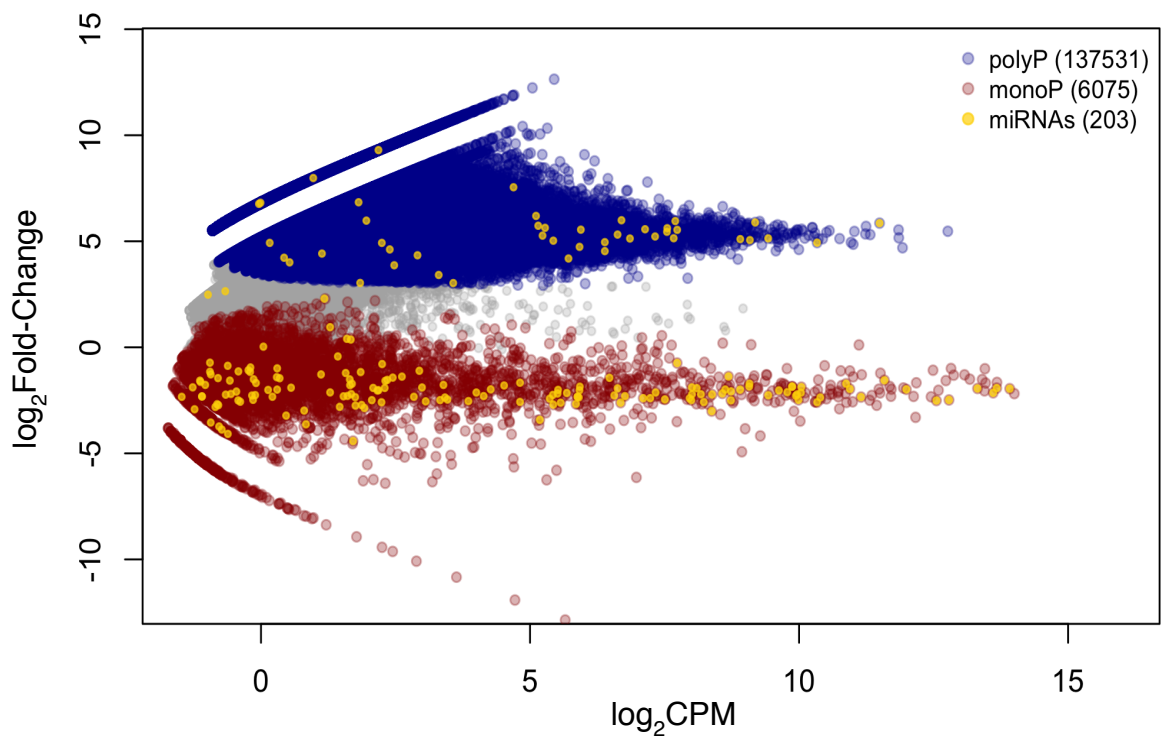

### C) *H. bakeri* Vesicle libs, monoP and polyP-enriched clusters

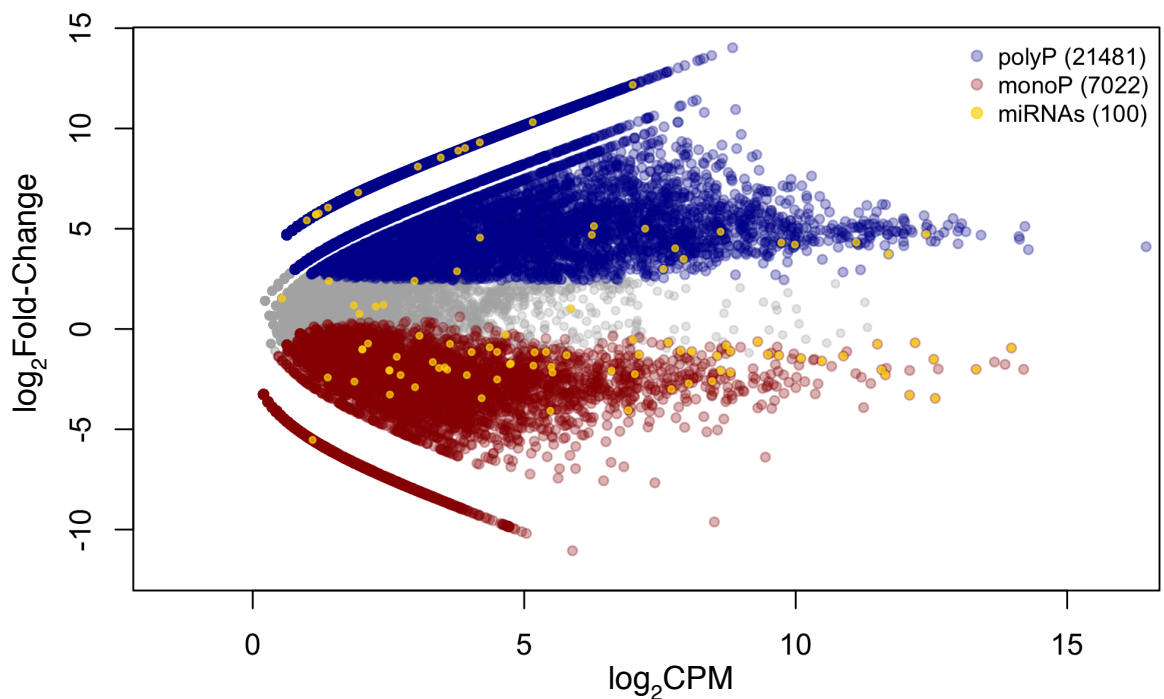

# Supplemental Figure 3

## *C. elegans*, adult libraries

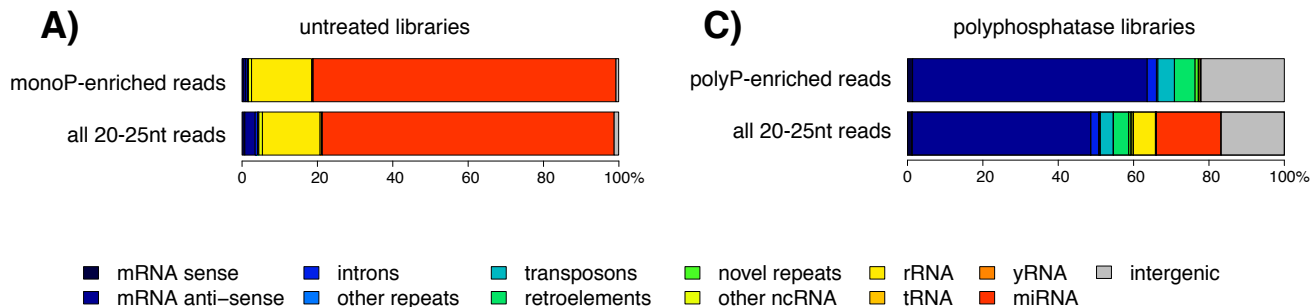

## *H. bakeri*, adult libraries

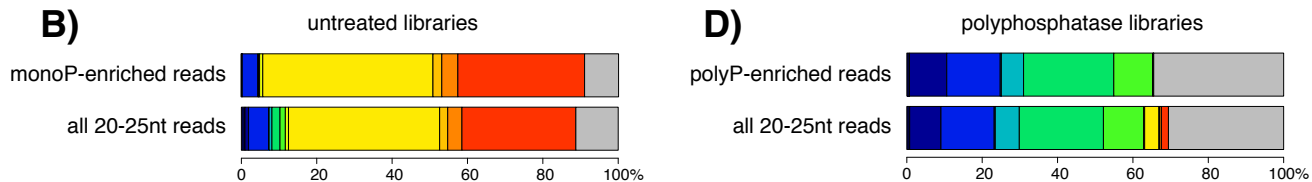

# Supplemental Figure 4

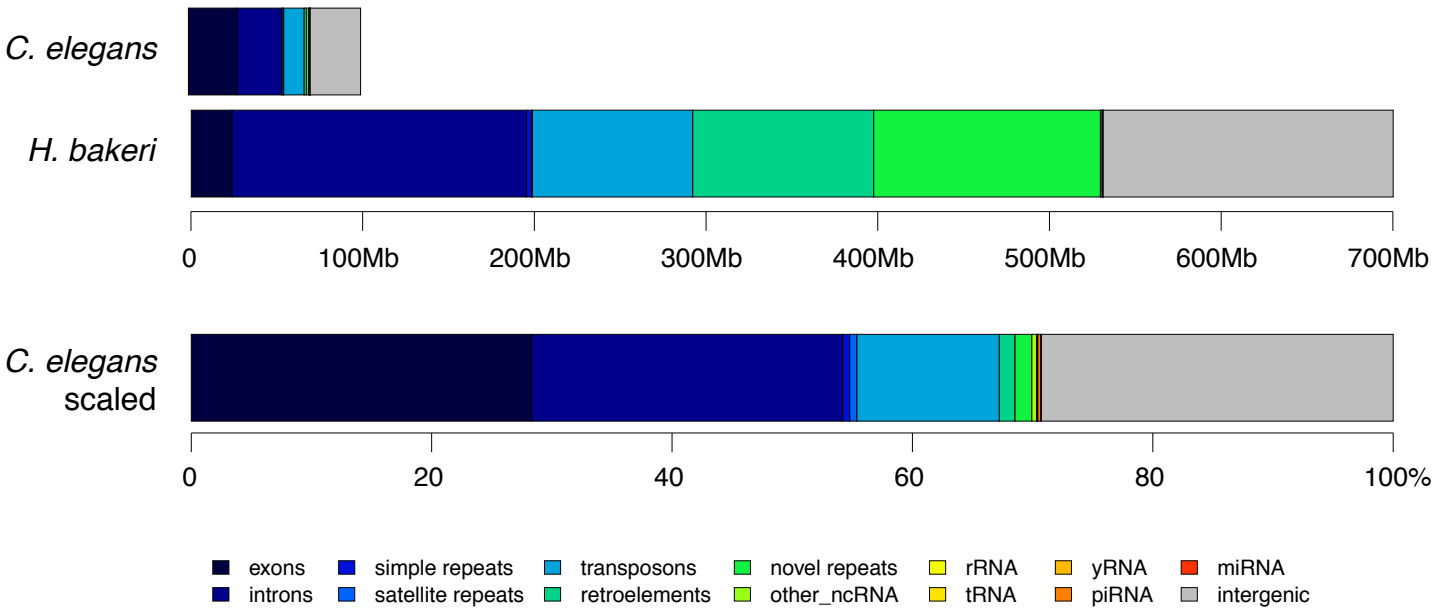

Supplemental Table 1: *Heligmosomoides bakeri* genome assembly

| <b>Feature</b>                                  | <b><i>Heligmosomoides bakeri</i><br/>genome assembly v2.0</b> | <b><i>Heligmosomoides bakeri</i><br/>genome assembly v1.0</b> |
|-------------------------------------------------|---------------------------------------------------------------|---------------------------------------------------------------|
| Reference                                       | This work                                                     | WTSI                                                          |
| Span (Mb)                                       | 696                                                           | 560                                                           |
| G+C content (%)                                 | 45.6                                                          | 45.0                                                          |
| Scaffold / contig N50 (kb)                      | 179.6 / 42.6                                                  | 35.8 / 12.8                                                   |
| Number of contigs                               | 23647                                                         | 44728                                                         |
| Genome CEGMA complete / partial (%)             | 88.7 / 8.1                                                    | 78.8 / 18.1                                                   |
| Genome BUSCO (Nematoda) complete / partial (%)  | 87.1 / 7.2                                                    | 67.8 / 10.7                                                   |
| Genome BUSCO (Eukaryota) complete / partial (%) | 87.8 / 1.7                                                    | 74.3 / 8.9                                                    |
| Transcriptome mapping                           | 96.3%                                                         | 72.3%                                                         |
| Number of protein-coding genes                  | 24371                                                         | 27459                                                         |
